# Supplementary material for: Argonaute 2-dependent Regulation of Gene Expression by Single-stranded miRNA Mimics
Source: PubMed Central journal article supplement — Mol Ther. 2016 Mar 22;24(5):946–55. doi: 10.1038/mt.2016.39 (PMC4881773; doi:10.1038/mt.2016.39), 2016-03-22
Supplement: mt201639x1.pdf [file mt201639x1.pdf]

## Supplementary Information

# Argonaute 2-dependent Regulation of Gene Expression by Single-stranded miRNA Mimics

Masayuki Matsui<sup>1</sup>, Thazha P. Prakash<sup>2</sup>, and David R. Corey<sup>1,\*</sup>

<sup>1</sup> Departments of Pharmacology and Biochemistry, University of Texas Southwestern Medical Center, Dallas, TX 75390-9041, USA.

<sup>2</sup> Department of Medicinal Chemistry, Ionis Pharmaceuticals, Carlsbad, CA 92010, USA

\* Corresponding author (david.corey@utsouthwestern.edu)

**A**

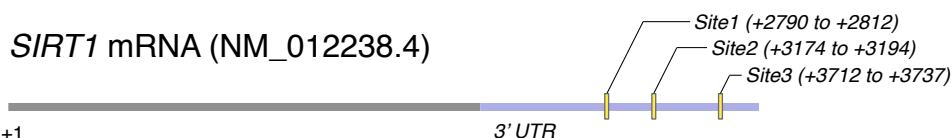

Site1: (M)

```
3' ugUUGGU-CGAUUCUGUGACGGu 5' hsa-miR-34a-5p
      ||::| | | | | | | |
5' acAAUUUUUUAAACACUGGCa 3' SIRT1 (+2790 to +2812)
```

Site2: (M, T)

```
3' uguUGGUCGAUUCUGUGACGGu 5' hsa-miR-34a-5p
      || || | | | | | |
5' uccACAAG-UAUUAAACUGCCa 3' SIRT1 (+3174 to +3194)
```

Site3: (M, T)

```
3' ugUUGGUCGAUUCU----GUGACGGu 5' hsa-miR-34a-5p
      | | | | | | | | | | | |
5' acACCCAGCUAGGACCAUACUGCCa 3' SIRT1 (+3712 to +3737)
```

**B**

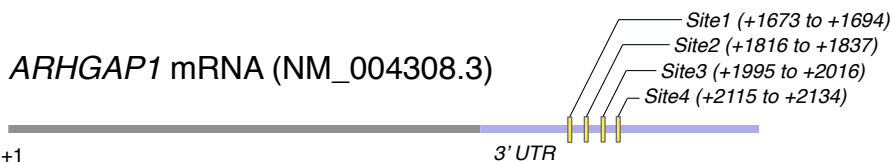

Site1: (M, T)

```
3' uguuggucgauucuGUGACGGu 5' hsa-miR-34a-5p
      | | | | | |
5' ugccuuacacuucuCACUGCCu 3' ARHGAP1 (+1673 to +1694)
```

Site2: (M, T)

```
3' uguuggucgauucugUGACGGu 5' hsa-miR-34a-5p
      | | | | | |
5' uggaugaaucaaaugACUGCCg 3' ARHGAP1 (+1816 to +1837)
```

Site3: (M, T)

```
3' uguuGGUCGAUUCUGUGACGGu 5' hsa-miR-34a-5p
      | : | | | | : | | | | |
5' caccCUUGCUCUGUACUGCCc 3' ARHGAP1 (+1995 to +2016)
```

Site4: (M, T)

```
3' uguuGGUCGAUUCUGUGACGGu 5' hsa-miR-34a-5p
      | | | | | | | | | |
5' uuucCCAAGU--GAUACUGCCc 3' ARHGAP1 (+2115 to +2134)
```

**C**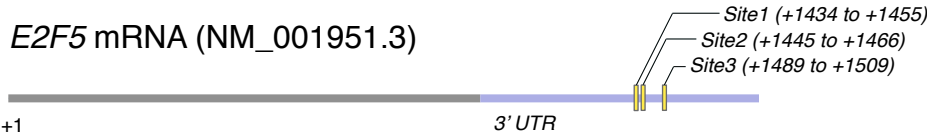**Site1:** (M, T)

```

3' uguuggucgauucuGUGACGGu 5' hsa-miR-34a
      :|||||
5' uugucuuaauuuuuUACUGCCa 3' E2F5 (+1434 to +1455)

```

**Site2:** (M)

```

3' uguugGUCGAUUCUGUGACGGu 5' hsa-miR-34a
      | || | | |||||
5' uuuuaCUGCCACUAAACUGCCu 3' E2F5 (+1445 to +1466)

```

**Site3:** (M, T)

```

3' ugUUGGUCGAUUC-UGUGACGGu 5' hsa-miR-34a
      || ||| | | |||||
5' ccAAACAG--ACGUUCACUGCCa 3' E2F5 (+1489 to +1509)

```

**D**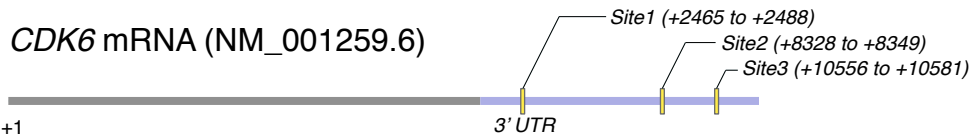**Site1:** (M, T)

```

3' uguUGGUCGAU--UCUGUGACGGu 5' hsa-miR-34a-5p
      ||: ||: | |||||
5' uguACUUUCUGCCACACACUGCCu 3' CDK6 (+2465 to +2488)

```

**Site2:** (M, T)

```

3' uguuggucgauucugUGACGGu 5' hsa-miR-34a-5p
      |||||
5' uauaacuacauauugACUGCCa 3' CDK6 (+8328 to +8349)

```

**Site3:** (M, T)

```

3' ugUUGGUCGAUUCU----GUGACGGu 5' hsa-miR-34a-5p
      || |||: :|| |||||
5' agAAGCAGUGUGAAAUUCACUGCCu 3' CDK6 (+10556 to +10581)

```

**Supplementary Figure S1. Potential target sites for miR-34a-5p on the 3' UTRs of *SIRT1*, *ARHGAP1*, *E2F5*, and *CDK6* mRNAs.** Two web-based programs “microRNA.org: microRNA Targets & Expression Profiles, August 2010 release” (<http://www.microrna.org/microrna/home.do>, cBio, the Computational Biology Center at Memorial Sloan-Kettering Cancer Center (MSKCC)) and “TargetScan release 7.0” (<http://www.targetscan.org>; Dr. David Bartel’s Lab/Whitehead Institute/MIT/HHMI) were used for predicting miR-34a-5p target sites. The predictions of base pairings shown in panel **A–D** are the results from microRNA.org. (M): Target sites predicted by microRNA.org; (T): Target sites predicted by TargetScan.

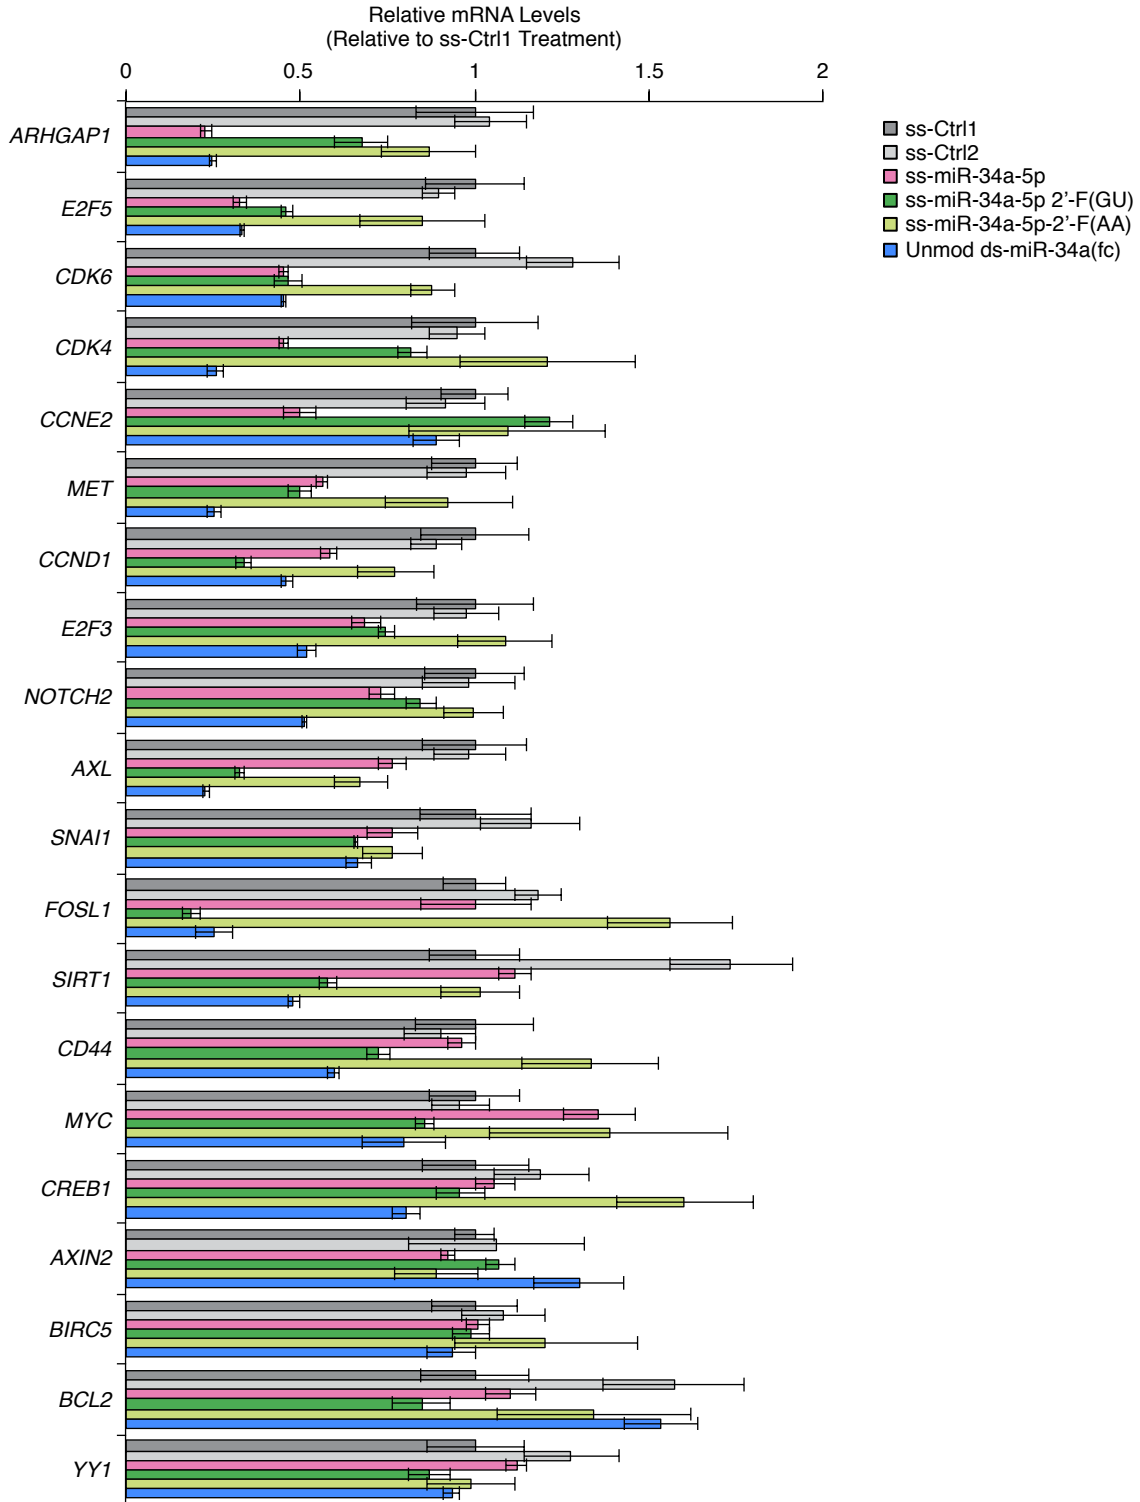

**Supplementary Figure S2. qPCR data showing the effect of miR-34a mimics on mRNA expression of 20 different miR-34a target genes.** Ss- and ds-miR-34a mimics and control oligomers (ss-Ctrl1, ss-Ctrl2) were transfected into HeLa cells at 50 nM using Lipofectamine RNAiMAX. Cells were harvested two days after transfection for qPCR analysis. Values are means  $\pm$  SD. n=4.

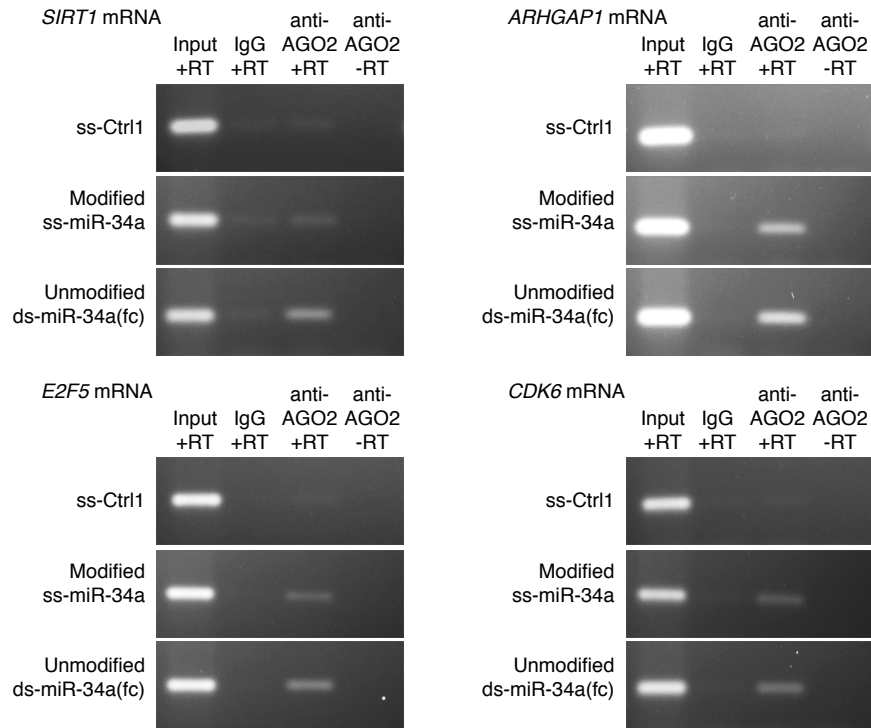

**Supplementary Figure S3. Analysis of qPCR products from AGO2-RIP experiments by agarose gel electrophoresis.** Before qPCR, each cDNA sample from AGO2-RIP experiments was appropriately diluted for normalization based on qPCR data for each input sample. After 31 (*SIRT1* mRNA), 30 (*ARHGAP1* mRNA, *E2F5* mRNA), or 29 (*CDK6* mRNA) cycles of qPCR, qPCR products were purified by ethanol precipitation and then analyzed by 1.5% agarose gel electrophoresis. The gels were stained with ethidium bromide. +RT: with reverse transcription, -RT: without reverse transcription.

**Supplementary Table S1. Sequences of duplex RNAs used in this study.**

| Strand Name          | dsRNA Name    | Sequence (5' → 3')      | Target                               |
|----------------------|---------------|-------------------------|--------------------------------------|
| ds-Ctrl (sense)      | ds-Ctrl       | UCGAAGUAAUCCGCGUACGdTdT | (Non-complementary Negative Control) |
| ds-Ctrl (antisense)  |               | CGUACGCGGAAUACUUCGAdTdT |                                      |
| siAGO1 (sense)       | siAGO1        | GGAGUUACUUUCAUAGCAUUU   | <i>AGO1</i> mRNA                     |
| siAGO1 (antisense)   |               | pAUGCUAUGAAAGUAAUCUUCU  |                                      |
| siAGO2-1 (sense)     | siAGO2 (pool) | GCACGGAAGUCCAUCUGAAUU   | <i>AGO2</i> mRNA                     |
| siAGO2-1 (antisense) |               | pUUCAGAUGGACUCCGUGCUU   |                                      |
| siAGO2-2 (sense)     |               | GCAGGACAAAGAUGUAUUUUU   |                                      |
| siAGO2-2 (antisense) |               | pUAAUACAUCUUUGUCCUGCUU  |                                      |
| siAGO2-3 (sense)     |               | GGGUCUGUGGUGAUAAAUAUU   |                                      |
| siAGO2-3 (antisense) |               | pUAUUUAUCACCACAGACCCUU  |                                      |
| siAGO2-4 (sense)     |               | GUAUGAGAACCCAAUGUCAUU   |                                      |
| siAGO2-4 (antisense) |               | pUGACAUUGGGUUCUCAUACUU  |                                      |
| siSirt1 (sense)      | siSirt1       | AGCUGGGGUGUCUGUUUCAdTdT | <i>SIRT1</i> mRNA                    |
| siSirt1 (antisense)  |               | UGAAACAGACACCCAGCUdTdT  |                                      |

siRNA sequences are listed 5' to 3'. The oligomers have two dT or U overhangs at their 3' end. siAGO2 was used as a pool of 4 different siAGO2 at total 25 nM (siAGO2-1 (6.25 nM) + siAGO2-2 (6.25 nM) + siAGO2-3 (6.25 nM) + siAGO2-4 (6.25 nM)). p: phosphate.

**Supplementary Table S2. Sequences of qPCR primers used in this study.**

| Strand Name   | Sequence (5' → 3')       | Strand Name     | Sequence (5' → 3')       |
|---------------|--------------------------|-----------------|--------------------------|
| ARHGAP1 ex3F  | GGAACCTGTCCACACACCTGAA   | YY1 ex2F        | GAATACCTGGCATTGACCTCTC   |
| ARHGAP1 ex4R  | ACAATGATCTTCCGCCCATAC    | YY1 ex3R        | TGTTCTTGGAGCATCATCTTCTT  |
| E2F5 ex2F     | CTGCTGATACTTTGGCTGTGAG   | P4HA1 ex5F      | ACGCTCCAGGATACCTACAA     |
| E2F5 ex3R     | ATTACAGCCAGCACCTACAC     | P4HA1 ex6R      | CTGCTTCTGTATAGGCCACTTT   |
| CDK6 ex3F     | CTTGGATAAAGTTCCAGAGCCT   | CCAR1 ex11F     | GCACAGAGAAGTAGAGTCCTTAGA |
| CDK6 ex4R     | TTTAGATCGCGATGCACTACTC   | CCAR1 ex12R     | TCAGCAAGAGCACATGACTTAT   |
| CDK4 ex3F     | GTAGACCAGGACCTAAGGACATA  | CHKA ex1F       | CTATCTGTGGTGCAAGGAGTT    |
| CDK4 ex4R     | TGCAATTGGCATGAAGGAAATC   | CHKA ex2R       | GGAACAGCATGTTGCTAAGG     |
| CCNE2 ex5F    | TTATTAATCCTTACCTTTGCC    | MTOR ex7F       | CGGTGTTGCAGAGACTTGAT     |
| CCNE2 ex6R    | GAAGTATGGACCTCATCTGTG    | MTOR ex8R       | TCATTTGGATCAGCGAGTTCTT   |
| MET ex6F      | GGAAGTTGGATTTCGGAGGAATA  | TPD52L2 ex2/3JF | CTTACCAAGGTGGAAGAGGAAAT  |
| MET ex7R      | AGGACCAACTGTGCATTTCA     | TPD52L2 ex3R    | CTCCTGGACAGGTTCTGTTTC    |
| CCND1 ex2F    | GTTTCGTGGCCTCTAAGATGAA   | HMGA2 ex3F      | CAAGAGGCAGACCTAGGAAATG   |
| CCND1 ex3R    | AGGTTCCACTTGAGCTTGTT     | HMGA2 ex5R      | GCAGACTCTTGTGAGGATGTC    |
| E2F3 ex2F     | GCACTACGAAGTCCAGATAGTC   | FIGN ex2F       | GGAATTCCTGCTTGTGAGAAATC  |
| E2F3 ex3R     | GGCTCAGGAGCTGAATGAA      | FIGN ex3R       | GTGATGTCAAAGTGCTGTTCTG   |
| NOTCH2 ex7F   | GCTGACTGCACAGAAGATGT     | PLAGL2 ex2F     | AGACCATATAGCTGCCCTCA     |
| NOTCH2 ex8R   | CTTCAGACACTCACAGTGAAG    | PLAGL2 ex3R     | TCCTTGCGGTGAAACATCTTA    |
| AXL ex10F     | GTCCTCATCTTGGCTCTCTTC    | NRAS ex4F       | CCAAGAGTTACGGGATTCCATT   |
| AXL ex11R     | GACTACCAGTTCACCTCTTTCC   | NRAS ex5R       | CGGTAAGTGGCGTATTTCTCTTAC |
| SNAI1 ex1/2JF | GCAGGACTCTAATCCAGAGTTTAC | SOX9 ex1/2JF    | GCAAGCTCTGGAGACTTCTG     |
| SNAI1 ex2R    | AGGACAGAGTCCCAGATGAG     | SOX9 ex2R       | CGCGGCTGGTACTTGTAAATC    |
| FOSL1 ex3F    | GGAAGGAACTGACCGACTTC     | EIF2C1(AGO1)    | Hs00201864_m1 (ABI)      |
| FOSL1 ex4R    | CTTCTGCAGCTCCTCAATCT     | EIF2C2(AGO2)    | Hs00293044_m1 (ABI)      |
| SIRT1 ex5F    | TGCGGGAATCCAAAGGATAAT    | h18S F          | GACCAGAGCGAAAGCATTG      |
| SIRT1 ex6R    | TCGTACAGCTTCACAGTCAAC    | h18S R          | TCGGAACTACGACGGTATCT     |
| CD44 ex2F     | ACCTCTGCAAGGCTTTCAATA    |                 |                          |
| CD44 ex3R     | CACCACGTGCCCTTCTATG      |                 |                          |
| MYC ex2F      | TCGGATTCTCTGCTCTCCT      |                 |                          |
| MYC ex3R      | CAACATCGATTTCTTCTCATCTTC |                 |                          |
| CREB1 ex4F    | TCACAGGAGTCAGTGGATAGT    |                 |                          |
| CREB1 ex5R    | CCTGGTGCATCAGAAGATAAGT   |                 |                          |
| AXIN2 ex2F    | CGGAAACTGTTGACAGTGGATA   |                 |                          |
| AXIN2 ex3R    | TGGCTGGTGCAAAGACATAG     |                 |                          |
| BIRC5 ex3F    | GCGCTTTCCTTTCTGTCAAG     |                 |                          |
| BIRC5 ex4R    | CTCCGCAGTTTCTCAAATTC     |                 |                          |
| BCL2 ex2F     | GCCCTGTGGATGACTGAGTA     |                 |                          |
| BCL2 ex3R     | GCCAGGAGAAATCAAACAGAGG   |                 |                          |
